# Supplementary material for: UV-protection and fluorescence properties of the exoskeleton obtained from a living diatom modified by an Eu3+-complex
Source: Royal Society of Chemistry journal article supplement (doi:10.1039/d1tc01700d), 2021-01-01
Supplement: d1tc01700d1.pdf [file d1tc01700d1.pdf]

## Supplementary data

### Strong UV-Protection and Fluorescence Properties from Living Diatom Exoskeleton Modified by $\text{Eu}^{3+}$ -Complex

Lili Li<sup>a</sup>, Xiaoshuang Yu<sup>a</sup>, Abdur Raheem Aleem<sup>a</sup>, Xiaolin Zhang<sup>a</sup>, Yue Zhao<sup>a</sup>, Xinzhi Wang<sup>a</sup>, Yanying Zhang<sup>a</sup>, Yao Wang<sup>a</sup>, Wenfei Shen<sup>a</sup>, Olle Inganäs<sup>\*b</sup> and Jianguo Tang<sup>\*a</sup>

<sup>a</sup>Institute of Hybrid Materials, National Center of International Joint Research for Hybrid Materials Technology, National Base of International Sci. & Tech. Cooperation on Hybrid Materials, College of Materials Science and Engineering, Qingdao University, 308 Ningxia Road, Qingdao 266071, P. R. China.

<sup>b</sup>Biomolecular and Organic Electronics, Department of Physics, Chemistry and Biology (IFM), Linköping University, SE-581 83, Linköping, Sweden.

Corresponding author:

Jianguo Tang: Qingdao University, 308 Ningxia Road, Qingdao, CN 266071. E-mail: tang@qdu.edu.cn.

Olle Inganäs: Linköping University, Linköping. E-mail: olle.inganäs@liu.se.

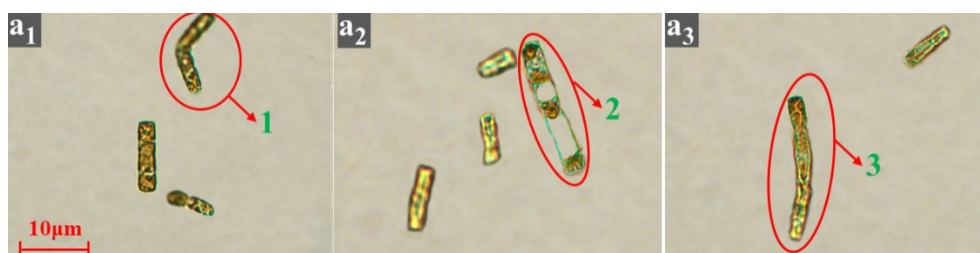

Figure S1 Optical microscope pictures of living diatoms(a<sub>1</sub>, a<sub>2</sub> and a<sub>3</sub>). The magnification is 40×10.

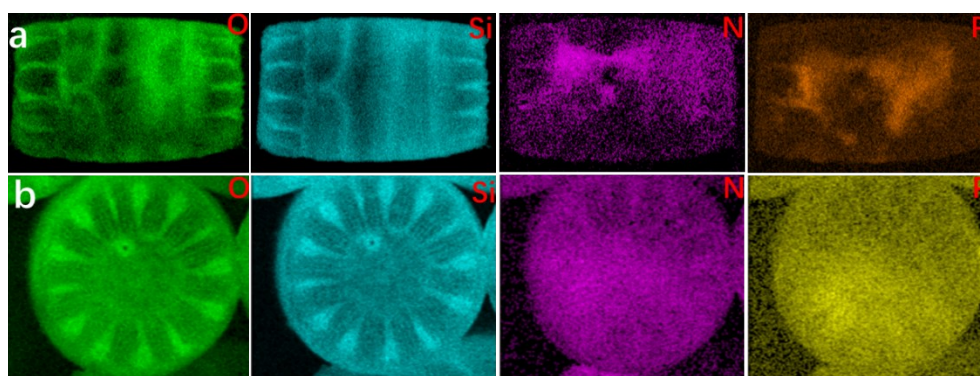

Figure S2 Energy dispersive X-ray spectroscopy (EDS) mappings images about girleband (a) and epitheca (b) of the DS.

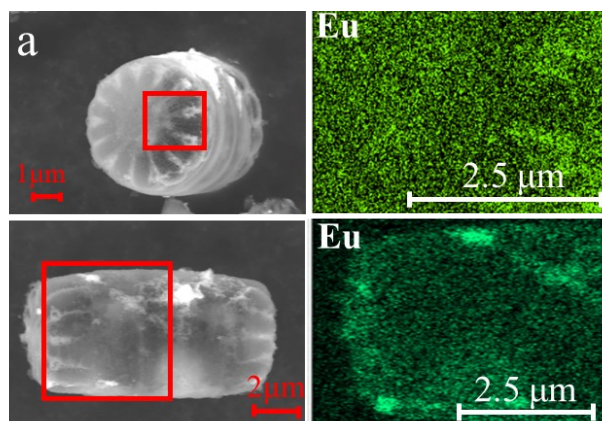

Figure S3 Energy dispersive X-ray spectroscopy (EDS) mappings images of the USDU (a).

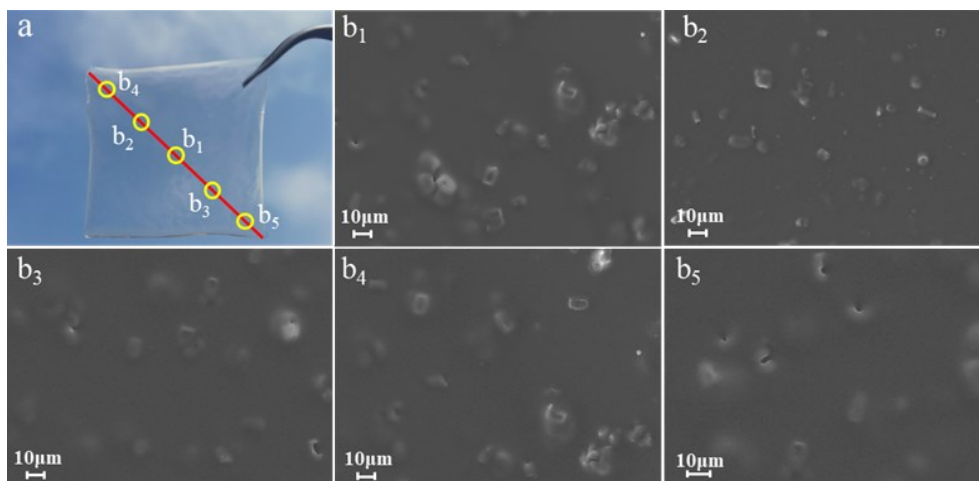

Figure S4 USDU@PAN film under sunlight (a). SEM images of different parts of USDU@PAN film ( $b_1$ ,  $b_2$ ,  $b_3$ ,  $b_4$  and  $b_5$ ).

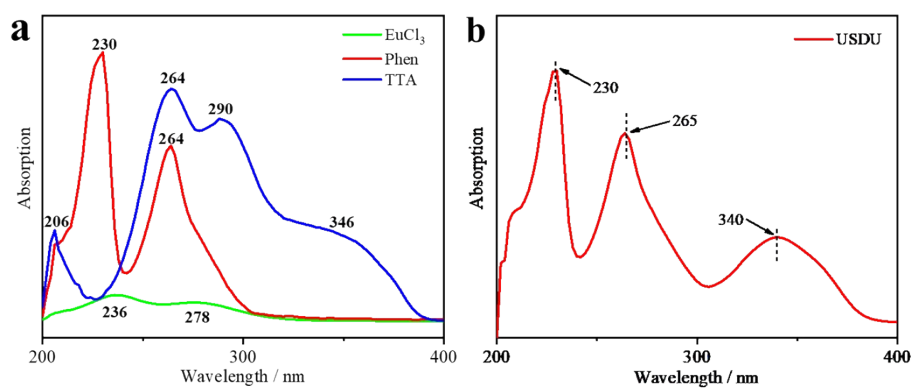

Figure S5 UV-vis absorption of  $\text{EuCl}_3$ , Phen, TTA (a) and USDU (b).

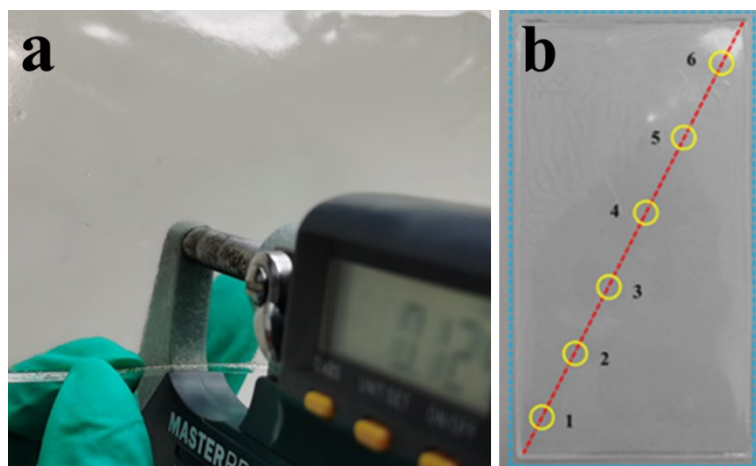

Figure S6 USDU@PAN Film thickness measurement (a) and the location selected on USDU@PAN film.

Table S1 the thickness of the film.

| location                   | 1   | 2   | 3   | 4   | 5   | 6   | average |
|----------------------------|-----|-----|-----|-----|-----|-----|---------|
| Thickness( $\mu\text{m}$ ) | 113 | 118 | 121 | 124 | 119 | 115 | 118.3   |
